# Supplementary material
Source: Springer Nature journal article supplement (https://www.springermedizin.de/resource/supplementary/13018_2009_167_MOESM3_ESM.pdf/9636456)

# Location of vascular injuries

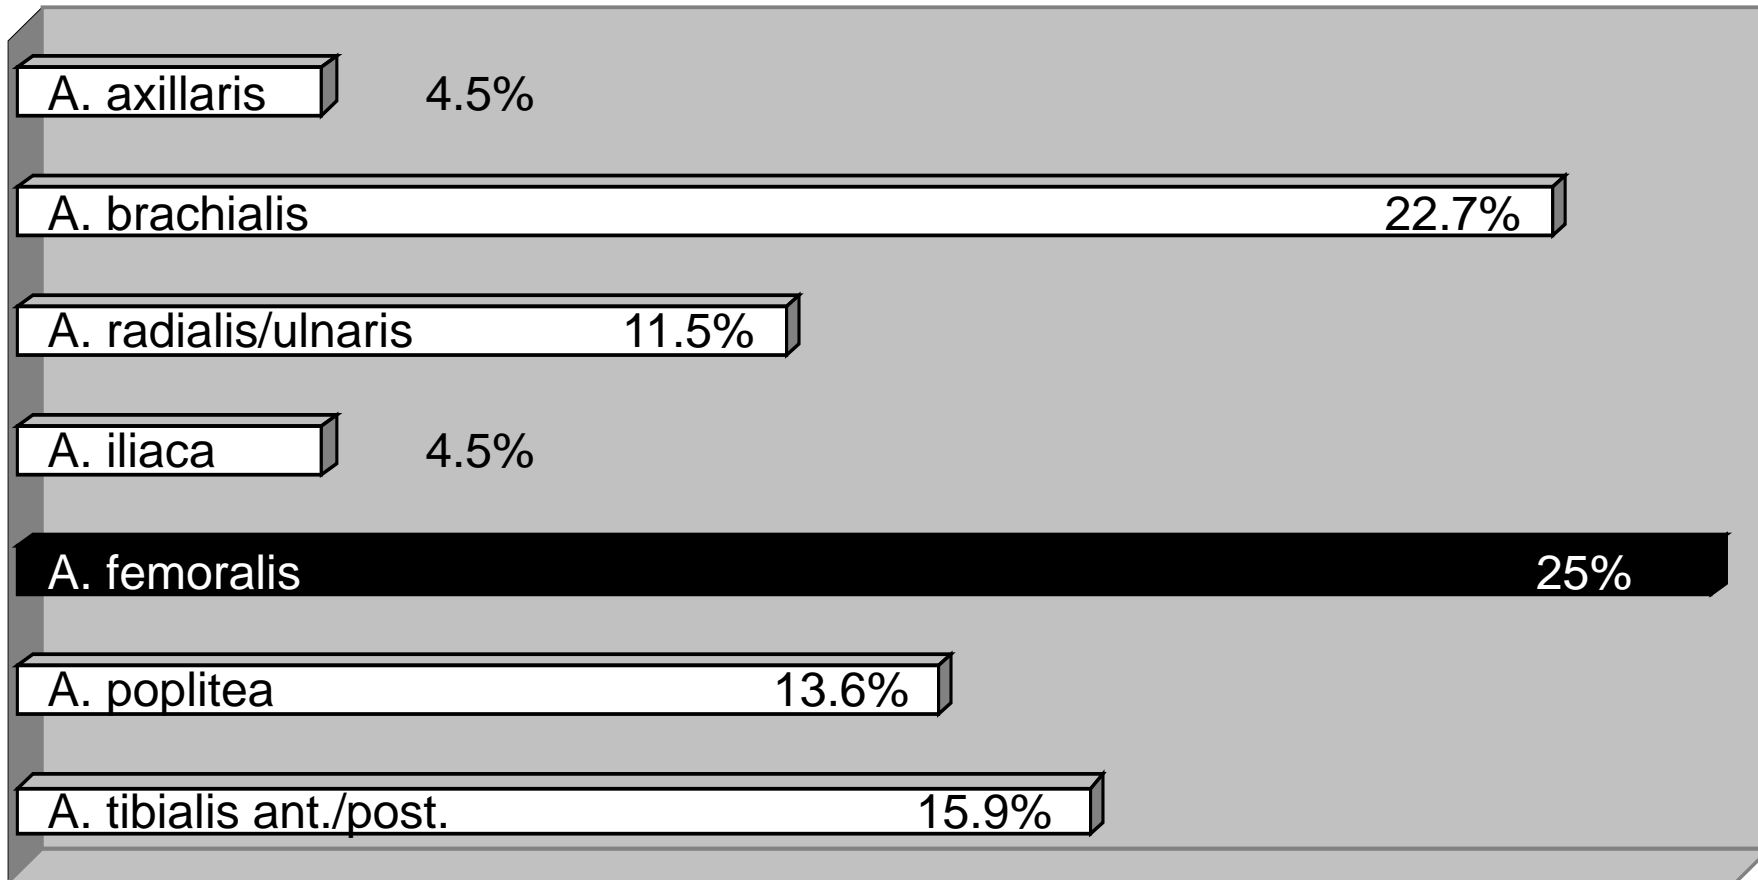

[ *A. dorsalis pedis* (2.3%) not shown ]

Supplement: MOESM3 [file 9636456]
